# Supplementary material for: An efficient RNA interference screening strategy for gene functional analysis
Source: PubMed Central journal article supplement (PMC3533828; doi:10.1186/1471-2164-13-491), 2012-09-18
Supplement: 1471-2164-13-491-S1.pdf [file 1471-2164-13-491-S1.pdf]

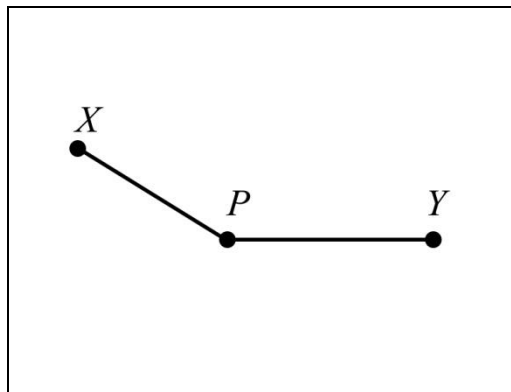

**Figure S1. A simple example of a powerful subsequence  $P$ .**  $X$ ,  $Y$  and  $P$  are subsequences, and the edges indicate the neighborhood relationship of these variables. According to this figure,  $X$  and  $Y$  are the *neighbors* of  $P$ , but  $X$  and  $Y$  are not close to each other. In the case, the reverse complement sequence of  $P$  has the potential to silence all three of the genes ( $X$ ,  $Y$  and  $P$ ), but the reverse complement sequence of  $X$  or  $Y$  can only silence two of the genes. Because  $P$  can cover all of its *neighbors'* target genes,  $P$  is more powerful than  $X$  and  $Y$ . In this case, we say  $P$  is a powerful subsequence, and  $X$  and  $Y$  are dominated by  $P$ .

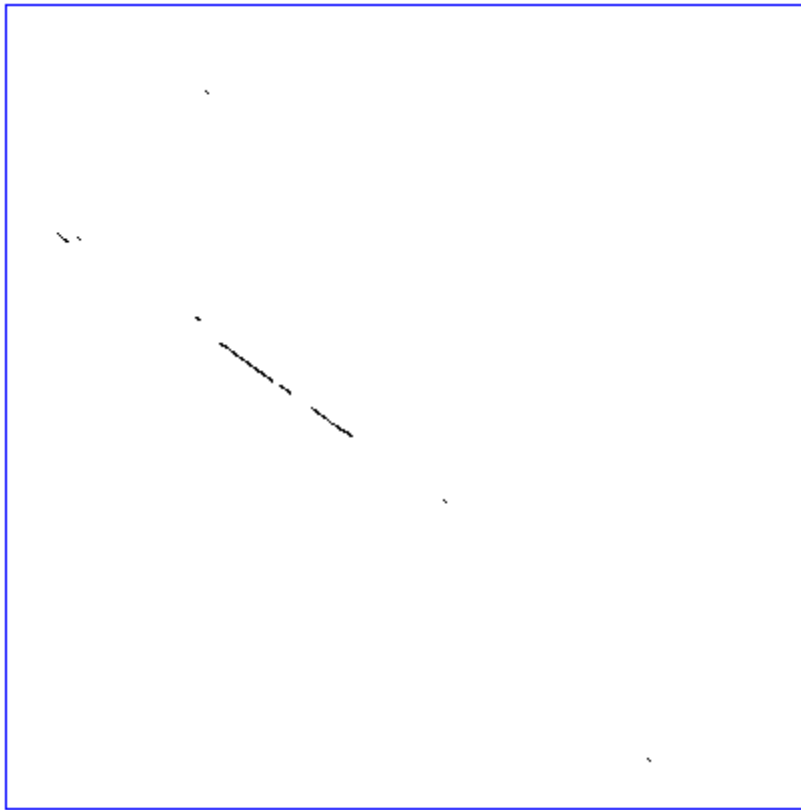

**Figure S2.** The dotplot of TF15 and TF21 sequences with parameters window size and mismatch set as 21 and 5, respectively.
