# Supplementary material for: An efficient RNA interference screening strategy for gene functional analysis
Source: PubMed Central journal article supplement (PMC3533828; doi:10.1186/1471-2164-13-491), 2012-09-18
Supplement: 1471-2164-13-491-S2.pdf [file 1471-2164-13-491-S2.pdf]

The *distinguishing substring selection* problem (DSSP) has been proven to be NP-complete, and it is defined as follows:

Input:

- A set  $S_g = \{s'_1, s'_2, \dots, s'_{n1}\}$  of  $n_1$  (good) strings of length at least  $L$ .
- A set  $S_b = \{s_1, s_2, \dots, s_{n2}\}$  of  $n_2$  (bad) strings of length at least  $L$ .
- Two non-negative integers  $d_g$  and  $d_b$ ,  $d_g > d_b$ .

Output:

Find a string  $x$  such that each string  $s_i \in S_b$  has at least a length  $L$  substring  $v_i$  of  $s_i$  with  $HD(x, v_i) \leq d_b$ , and for every string  $s'_i \in S_g$ ,  $HD(x, v'_i) \geq d_g$  for each length- $L$  substring  $v'_i$  of  $s'_i$ .

The *qualified sequence finding problem* is defined as follows:

Input:

Given a set of  $n$  candidate-genes,  $C = \{c_1, c_2, \dots, c_n\}$ , a set of  $m$  excluded-genes,  $E = \{e_1, e_2, \dots, e_m\}$ , and three integers  $L$ ,  $d_N$  and  $d_T$ ,  $L > d_N > d_T$ .

Output:

Find a sequence  $r$  of length  $L$  such that there exists a subset of candidate-genes  $T$ ,  $T \subseteq C$ , and for each gene  $t_i \in T$ ,  $HD(r, u_i) \leq d_T$  for some length  $L$  substring  $u_i$  of  $t_i$  and for each gene  $g_i \in \{E \cup C - T\}$ ,  $HD(r, u'_i) \geq d_N$  for any length  $L$  substring  $u'_i$  of  $g_i$ .

**Theorem 1.** The problem of finding a qualified sequence  $r$  maximizing the size of  $T$  is NP-complete.

**Proof.**

1. Finding a qualified sequence  $r$  maximizing the size of  $T$  is in NP.

Given a qualified sequence  $r$ , we can verify the sequence and obtain the size of  $T$  in polynomial time. We compute the Hamming distance between  $r$  and all subsequences, which are enumerated from the candidate-genes and the excluded-genes by a sliding window. Next, we examine whether  $r$  is within a  $d_T$  distance to some candidate-gene(s) and has at least a  $d_N$  distance to all of the other genes. If  $r$  meets the above conditions, then  $r$  is valid, and the size of  $T$  is the number of candidate-genes that are within  $d_T$  distance to  $r$ . Otherwise,  $r$  is invalid, and the size of  $T$  is zero.

2. Reduce the DSSP to the problem of finding a qualified sequence  $r$  maximizing the size of  $T$ .

Given an instance  $I$  of DSSP, we construct an instance  $F$  of finding a qualified sequence  $r$  maximizing the size of  $T$  as follows. Let  $C=S_b$ ,  $E=S_g$ ,  $d_N=d_g$  and  $d_T=d_b$ . Obviously, this can be done in polynomial time. Now, we show that there is a string  $x$  that meets the conditions for instance  $I$  if and only if there is a valid sequence  $r$  maximizing the size of  $T$  and  $T = C$  for instance  $F$ .

First, suppose there is a string  $x$  such that each string  $s_i \in S_b$  has at least a length  $L$  substring  $v_i$  of  $s_i$  with  $HD(x, v_i) \leq d_b$  and in every string  $s'_i \in S_g$  for each length  $L$  substring  $v'_i$  of  $s'_i$ ,  $HD(x, v'_i) \geq d_g$ . Define sequence  $r = x$  and  $T = S_b$ . Obviously, each sequence  $t_i \in T$  has a length  $L$  substring  $u_i$  of  $t_i$  with  $HD(r, u_i) \leq d_T$  in every sequence  $g_i \in \{E \cup C - T\}$  for each length  $L$  substring  $u'_i$  of  $g_i$ ,  $HD(r, u'_i) \geq d_N$ , and the size of  $T$  is maximum.

Conversely, suppose there is a sequence  $r$  and  $T$ , where  $T = C$  such that each string  $t_i \in T$  has a length  $L$  substring  $u_i$  of  $t_i$  with  $HD(r, u_i) \leq d_T$ , and for every string  $g_i \in \{E \cup C - T\}$ ,  $HD(r, u'_i) \geq d_N$  for each length  $L$  substring  $u'_i$  of  $g_i$ . Define string  $x = r$ . Obviously, each string  $s_i \in S_b$  has a length  $L$  substring  $v_i$  of  $s_i$  with

$HD(x, v_i) \leq d_b$  and for every string  $s'_i \in S_g$ , for any length- $L$  substring  $v'_i$  of  $s'_i$ ,  
 $HD(x, v'_i) \geq d_g$ .

Because DSSP can be reduced to the problem of finding a qualified sequence  $r$  maximizing the size of  $T$  in polynomial time, finding a qualified sequence  $r$  maximizing the size of  $T$  is an NP-complete problem.
