# Supplementary material for: An efficient RNA interference screening strategy for gene functional analysis
Source: PubMed Central journal article supplement (PMC3533828; doi:10.1186/1471-2164-13-491), 2012-09-18
Supplement: 1471-2164-13-491-S4.pdf [file 1471-2164-13-491-S4.pdf]

Table S1

Parameters:  $d_T=4, d_N=5, L=21$

Number of non-redundant qualified siRNAs: **2147**

Number of qualified siRNAs selected in the first round of RNAi analysis: **94**

Number of candidate-genes examined in the first round of RNAi analysis: **229**

Average examination frequency of each gene: **1.17030567686**

| No. | Selected qualified siRNA | Target genes of qualified siRNA (TF number) | *Qualified sequence |          | **Mismatch numbers     |
|-----|--------------------------|---------------------------------------------|---------------------|----------|------------------------|
|     |                          |                                             | TF number           | Position |                        |
| 1   | UCUCAAUUCUUUCUUUAUCUGCA  | 209, 207, 210, 208, 68, 86, 45, 58          | 58                  | 75       | 4, 4, 3, 2, 4, 4, 4, 0 |
| 2   | UUCCCCUCCCCGACAUCUCCU    | 206, 75, 108, 23, 116                       | 116                 | 37       | 4, 4, 4, 4, 0          |
| 3   | AUCCGCCGUCGCCGCCGUCUC    | 4, 25, 106, 61, 49                          | 49                  | 322      | 4, 4, 4, 3, 0          |
| 4   | CCAUCAGCCGUCGUCUCCAGCG   | 158, 37, 6, 120                             | 120                 | 350      | 4, 4, 4, 0             |
| 5   | AAGGUGCCAAGCCAAGCCCGG    | 149, 102, 112, 90                           | 90                  | 240      | 4, 4, 2, 0             |
| 6   | CUUUAAACUUCUUCUGGAUUC    | 220, 132, 36, 221                           | 221                 | 443      | 2, 4, 2, 0             |
| 7   | ACAUAGUUUAUAUCUCAUCG     | 159, 73, 67, 146                            | 146                 | 158      | 4, 4, 4, 0             |
| 8   | GACAAGGUGCUUGUUUAUUGUU   | 217, 222, 39, 70                            | 70                  | 359      | 4, 2, 4, 0             |
| 9   | AUAAAAAGUUACGGUUGAAGU    | 167, 175, 82, 74                            | 74                  | 254      | 4, 4, 4, 0             |
| 10  | UACAAAUAUAUAUUGAGCA      | 38, 77, 3, 145                              | 145                 | 874      | 4, 4, 0, 0             |
| 11  | AAUCAUAAUUUAAGGUUCCAA    | 120, 97, 47, 5                              | 5                   | 871      | 2, 4, 4, 0             |
| 12  | GCGAGAACAUGAGUAGCAAAA    | 209, 66, 29, 60                             | 60                  | 214      | 4, 4, 4, 0             |
| 13  | CACCUGCGGCCCAUCCCU       | 125, 215, 50, 217                           | 217                 | 1018     | 4, 4, 4, 0             |
| 14  | GUAAAGGAAAACAACAGAGAA    | 207, 165, 200, 85                           | 85                  | 352      | 4, 4, 4, 0             |
| 15  | UUCCAACUUCAGUUAAUUCUG    | 174, 26, 1                                  | 1                   | 209      | 4, 4, 0                |
| 16  | CAGCCAAACUUGUCUAGCAAC    | 103, 32, 79                                 | 79                  | 1035     | 4, 4, 0                |
| 17  | UCACUUUCGUCUAUAUUCUUC    | 118, 183, 194                               | 194                 | 487      | 4, 3, 0                |
| 18  | CAGAAUGGCAGCUUCAUCAUG    | 62, 65, 35                                  | 35                  | 326      | 4, 4, 0                |
| 19  | UCACCAGUAUCUGAAAAGCCA    | 135, 98, 163                                | 163                 | 286      | 4, 4, 0                |
| 20  | GAAAGCUGAGGCCUUUGCCGC    | 87, 76, 197                                 | 197                 | 264      | 4, 4, 0                |
| 21  | CUUCCAGCUCCUUCUCCGC      | 148, 124, 43                                | 43                  | 768      | 4, 4, 0                |
| 22  | CCAAUCAAGAACUAAAUGUC     | 100, 83, 219                                | 219                 | 1365     | 4, 4, 0                |
| 23  | CAUCUCAUCGAGUAUGAAAAG    | 171, 31, 212                                | 212                 | 1220     | 3, 4, 0                |
| 24  | AAUCAUUGGCUACGGGGCAUU    | 170, 138, 127                               | 127                 | 158      | 4, 3, 0                |
| 25  | CCGGGGGAAGUGGGCGCAGAG    | 227, 192, 199                               | 199                 | 696      | 4, 3, 0                |
| 26  | CGCGGCAGCGGCAGCCACCGU    | 218, 30, 78                                 | 78                  | 770      | 4, 3, 0                |
| 27  | CAGUGAUCAGAGCAAUACCAG    | 201, 27, 72                                 | 72                  | 742      | 4, 4, 0                |
| 28  | CACACUCCCUCCUCCUGCAU     | 224, 9, 164                                 | 164                 | 825      | 4, 4, 0                |
| 29  | UCAGUUGGAUGGAAUCGGAU     | 95, 33, 155                                 | 155                 | 276      | 4, 3, 0                |
| 30  | UGUGUGCUAUGUCUGGAAAUG    | 133, 91, 71                                 | 71                  | 1748     | 4, 4, 0                |
| 31  | CGUAGCGUAUUGUUUCUCAA     | 223, 28, 12                                 | 12                  | 24       | 3, 4, 0                |

|    |                        |               |     |      |         |
|----|------------------------|---------------|-----|------|---------|
| 32 | AAAACAACAUAAAGGAUCACUG | 188, 2, 48    | 48  | 805  | 3, 4, 0 |
| 33 | AAACUGCAUUUUCCUCCUUA   | 130, 166, 162 | 162 | 156  | 4, 4, 0 |
| 34 | AUUUUCUGCAUCCAUGGAAAU  | 131, 151, 96  | 96  | 883  | 4, 4, 0 |
| 35 | UUGCAACAAAAAUUAAGAUC   | 123, 10, 172  | 172 | 408  | 4, 4, 0 |
| 36 | UGUAGCUUUUCCAAUCCUCAA  | 154, 160, 156 | 156 | 326  | 4, 4, 0 |
| 37 | AAAACAGAACUUACCGUUC    | 111, 11, 63   | 63  | 1206 | 4, 4, 0 |
| 38 | UAUAAAAUCUAUAUAUCUUUC  | 129, 211, 134 | 134 | 1021 | 4, 4, 0 |
| 39 | CUCUCGGCUUCCACAUGGUUC  | 205, 189, 190 | 190 | 1    | 3, 4, 0 |
| 40 | AUACCUCACCAGUUCAAAGCA  | 176, 77, 57   | 57  | 147  | 4, 2, 0 |
| 41 | UCUGCCCAUAUUUCCUCCACU  | 187, 106, 157 | 157 | 502  | 2, 4, 0 |
| 42 | GGCCAAGAGCUCGUCUCCUC   | 80, 106, 69   | 69  | 114  | 4, 4, 0 |
| 43 | AACACGAAGCAAAAUCAGUA   | 47, 22, 119   | 119 | 230  | 4, 4, 0 |
| 44 | ACAUCCAUGCACGAAGAACAG  | 32, 18, 204   | 204 | 514  | 4, 4, 0 |
| 45 | AAUUGGACGGCUGGAUUUGAA  | 150, 144, 192 | 192 | 109  | 4, 4, 0 |
| 46 | UUUUCAGCUCGAGUAUCAGA   | 198, 41, 72   | 72  | 752  | 4, 3, 0 |
| 47 | ACAAAUAUAGAAAACGGAA    | 210, 153, 99  | 99  | 507  | 4, 4, 0 |
| 48 | CAUUUUUAUUUUUUUCAAUU   | 53, 50, 46    | 46  | 822  | 4, 4, 0 |
| 49 | ACUCCAUAACUAAAUCAACU   | 213, 55, 73   | 73  | 715  | 4, 4, 0 |
| 50 | AUACAUUCUCAUAUCCAAA    | 142, 56, 224  | 224 | 259  | 4, 3, 0 |
| 51 | AAUUACUCCACAAAGCAAAG   | 147, 39, 59   | 59  | 236  | 4, 4, 0 |
| 52 | AAUGAAAUCUGUAACACAUC   | 122, 227, 89  | 89  | 1028 | 4, 4, 0 |
| 53 | AAACAUAAAUAAGAGAACAG   | 107, 109, 63  | 63  | 1485 | 4, 3, 0 |
| 54 | CAUUGUGGUUCAGAAUCCUCA  | 101, 8        | 8   | 167  | 4, 0    |
| 55 | CGUGCUGCUCGGGUACCGGU   | 15, 21        | 21  | 418  | 1, 0    |
| 56 | AAACAAAAAAUAUCCUUUCG   | 113, 139      | 139 | 227  | 4, 0    |
| 57 | CCAGUUUGAAACCUGGAAGAA  | 117, 143      | 143 | 303  | 4, 0    |
| 58 | UGUUUCCCAACCCUACCAAAC  | 94, 44        | 44  | 306  | 4, 0    |
| 59 | CUGGAUUUAAAAGUGUGUUC   | 136, 177      | 177 | 85   | 4, 0    |
| 60 | GGAGUUUGCACAUGCUCAAU   | 40, 93        | 93  | 328  | 4, 0    |
| 61 | AAUUUCAGUUUGCAUGAAUGU  | 34, 181       | 181 | 287  | 4, 0    |
| 62 | UUGCAGUCCCACAUUCACA    | 179, 52       | 52  | 78   | 4, 0    |
| 63 | AUGUUGUCUCCUCCUCCAUA   | 228, 216      | 216 | 940  | 4, 0    |
| 64 | AAAUCCGGCGCAAGUUCAG    | 137, 169      | 169 | 82   | 4, 0    |
| 65 | CAUCUCGCUUCGAAUUUGAU   | 121, 229      | 229 | 979  | 4, 0    |
| 66 | GAUAAACAGUUUUUCAAAUUU  | 92, 152       | 152 | 78   | 4, 0    |
| 67 | CUGAGAGCUAGAACAAAAUUA  | 180, 226      | 226 | 11   | 4, 0    |
| 68 | AUGGAAGCAUGAUACAAAAGC  | 19, 110       | 110 | 679  | 4, 0    |
| 69 | CUCCAUGGAGAAAGAGAGCUA  | 161, 20       | 20  | 540  | 4, 0    |
| 70 | GGUAAAUGAAAACCCUGUGGA  | 193, 24       | 24  | 421  | 4, 0    |
| 71 | UAUAUCCUCCUCCAUAUCCUUU | 214, 186      | 186 | 161  | 4, 0    |
| 72 | AUUAGCUCCUUUGCUCAAUCC  | 64, 54        | 54  | 458  | 4, 0    |

|    |                       |               |     |      |         |
|----|-----------------------|---------------|-----|------|---------|
| 73 | AAACAGCUAAAUUGCAGUACG | 81, 225       | 225 | 1281 | 4, 0    |
| 74 | GUACUCCCCGAUGAUGCCGC  | 140, 51       | 51  | 485  | 4, 0    |
| 75 | CCCCCGCCAUGAAGAGGACC  | 13, 141       | 141 | 560  | 4, 0    |
| 76 | AGGAAAAUUGAGUUUUUCAA  | 114, 115      | 115 | 66   | 4, 0    |
| 77 | CAGCCUCGUCAGCGCAGCAGA | 195, 168      | 168 | 160  | 4, 0    |
| 78 | ACGCGGAGGAGUAAAUCGGC  | 128, 202      | 202 | 161  | 4, 0    |
| 79 | CAGCCAGAAGCUUGAUUUUUU | 173, 196      | 196 | 164  | 4, 0    |
| 80 | ACAGCUAAAUGACCUUCCUA  | 17, 104       | 104 | 254  | 4, 0    |
| 81 | AGAUGCAUGAUCAACAACUGC | 220, 184, 221 | 221 | 333  | 2, 4, 0 |
| 82 | UCUCCCCCUGGCCAUCUACA  | 206, 209, 14  | 14  | 167  | 4, 3, 0 |
| 83 | AGGAGCCCCACCUUCUCCGG  | 191, 15, 21   | 21  | 356  | 4, 4, 0 |
| 84 | AAUGCCAGAUACCUGCUGGUA | 203, 208, 209 | 209 | 418  | 4, 3, 0 |
| 85 | AAAAAAUUGCCUUCUUGCAUG | 88, 86, 45    | 45  | 838  | 4, 1, 0 |
| 86 | AGUAAGCCUUGAUUGGCAGAA | 105, 91, 95   | 95  | 856  | 4, 4, 0 |
| 87 | UAUUUCAGUGGUCACCAUGUC | 126, 77, 57   | 57  | 611  | 4, 2, 0 |
| 88 | AGAGCUCCGGCGAGAGUUUCG | 53, 7         | 7   | 395  | 4, 0    |
| 89 | GGAUCACGUGUCAAGCCAUI  | 123, 42       | 42  | 401  | 4, 0    |
| 90 | AUCCGUCCUAAGAAACAAGAA | 164, 182      | 182 | 113  | 4, 0    |
| 91 | CUGCUCUUCUCCAAGCAUC   | 199, 16       | 16  | 105  | 4, 0    |
| 92 | GAACGCGUAUGACAUGCAGAC | 185, 227      | 227 | 848  | 4, 0    |
| 93 | CCUAGACAACCAGUGAAACUC | 177, 178      | 178 | 131  | 3, 0    |
| 94 | AAAAAGUAUUACCUUUUAACA | 84, 212       | 212 | 1530 | 4, 0    |

\* The Transcription factor numbers and positions of the qualified sequences which the selected qualified siRNAs are derived from.

\*\* The mismatch numbers between qualified siRNA and its target genes.

Table S2

Parameters:  $d_T=4$ ,  $d_N=6$ ,  $L=21$

Number of non-redundant qualified siRNAs: **352**

Number of qualified siRNAs selected in the first round of RNAi analysis: **162**

Number of candidate-genes examined in the first round of RNAi analysis: **227**

Average examination frequency of each gene: **1.11013215859**

| No. | Selected qualified siRNA | Target genes of qualified siRNA (TF number) | *Qualified sequence |          | **Mismatch numbers |
|-----|--------------------------|---------------------------------------------|---------------------|----------|--------------------|
|     |                          |                                             | TF number           | Position |                    |
| 1   | UAUCGUAAGCUCGGGCCGCGG    | 167, 112, 74, 175                           | 175                 | 167      | 2, 3, 3, 0         |
| 2   | AAUAUGUAACUUGCCUGUUCG    | 206, 208, 210, 207                          | 207                 | 112      | 4, 4, 4, 0         |
| 3   | GGGGAGUUGCCUCGCAAUUUU    | 221, 220, 10, 36                            | 36                  | 27       | 3, 0, 4, 0         |
| 4   | GAAUGCCGCUACUCUCAUGAU    | 32, 45, 86                                  | 86                  | 503      | 4, 2, 0            |
| 5   | CGACUUGAGUUGGUGUCUUG     | 120, 49, 5                                  | 5                   | 113      | 1, 4, 0            |
| 6   | GCUGAUUCUCGGUUGGACAGC    | 24, 85, 165                                 | 165                 | 649      | 3, 4, 0            |
| 7   | ACCUUUGAUUUUUGUAAACGA    | 143, 80, 48                                 | 48                  | 1269     | 4, 4, 0            |
| 8   | CACGGCUGCCCUAAUAGCCGC    | 158, 6, 173                                 | 173                 | 279      | 4, 4, 0            |
| 9   | AGGUCACCUGCCGAUUAGUCG    | 211, 75, 209                                | 209                 | 248      | 4, 4, 0            |
| 10  | CGUAGCGUAUUGUUUCUCAA     | 223, 28, 12                                 | 12                  | 24       | 3, 4, 0            |
| 11  | UCCACAGCCUAACUCUUGCGU    | 91, 32, 204                                 | 204                 | 634      | 4, 1, 0            |
| 12  | AGAUGCUCGUGCCACCUCGGA    | 94, 151                                     | 151                 | 686      | 2, 0               |
| 13  | UUGUUGGCUGCGUGGACUCC     | 133, 168                                    | 168                 | 203      | 4, 0               |
| 14  | GGUUCGGUGCCCGUCGCGGC     | 184, 30                                     | 30                  | 343      | 4, 0               |
| 15  | UGGGAAAAUUCAGUCGGAUC     | 155, 227                                    | 227                 | 2533     | 4, 0               |
| 16  | GAACGGUAAUGCAUGUAAAAU    | 127, 170                                    | 170                 | 559      | 0, 0               |
| 17  | CUUGAUCACAGGAUUGCUGCG    | 7, 21                                       | 21                  | 483      | 4, 0               |
| 18  | UCUGCAUCCUAAAUUGGCAUA    | 122, 134                                    | 134                 | 437      | 4, 0               |
| 19  | UUGCAAGCCCAGAUGAGUCUC    | 226, 166                                    | 166                 | 232      | 4, 0               |
| 20  | GCUCCGCAAAGAACGGCCAAG    | 215, 216                                    | 216                 | 1294     | 3, 0               |
| 21  | AAUCUCGUACGCUAUUGAUGA    | 145, 63                                     | 63                  | 562      | 4, 0               |
| 22  | UCGAAUCUGUUUAGAGAGGA     | 60, 68                                      | 68                  | 493      | 4, 0               |
| 23  | AGAAACUAGGCAGACUUGUCU    | 119, 55                                     | 55                  | 140      | 4, 0               |
| 24  | AGAGUAACCACUGGAUCGGAA    | 160, 81                                     | 81                  | 182      | 4, 0               |
| 25  | CGAACUCAUCCAAGCACACCG    | 62, 14                                      | 14                  | 1        | 4, 0               |
| 26  | CCCGCACAGAAUAGAGCCCA     | 153, 121                                    | 121                 | 561      | 4, 0               |
| 27  | GCCCCUAAUCAUGCAGAUAG     | 35, 25                                      | 25                  | 624      | 4, 0               |
| 28  | AUUCAAGAGGCUAAGCAUGGG    | 123, 29                                     | 29                  | 764      | 4, 0               |
| 29  | GUGCACCGAAAUAACCAAAA     | 27, 219                                     | 219                 | 877      | 4, 0               |
| 30  | CUGGACGGCGGAUCUCGACUG    | 92, 61                                      | 61                  | 57       | 4, 0               |
| 31  | AAAGAGUAGACUGCUCCUAG     | 37, 125                                     | 125                 | 314      | 4, 0               |

|    |                        |               |     |      |         |
|----|------------------------|---------------|-----|------|---------|
| 32 | GCCUGCACAUAGUUUAUAAUC  | 67, 146       | 146 | 164  | 4, 0    |
| 33 | ACUCAUGCAUGAUCCAUUCAG  | 95, 33        | 33  | 549  | 4, 0    |
| 34 | UUGGUGACCGUAACCGUGUA   | 58, 79        | 79  | 332  | 4, 0    |
| 35 | UCGCAAAUGGCCUCCAGCCUA  | 90, 102       | 102 | 945  | 1, 0    |
| 36 | CGGCGUGUCACCCUGUACAU   | 43, 148       | 148 | 208  | 4, 0    |
| 37 | ACUUACAAGUCCAGUCUUA    | 179, 200      | 200 | 162  | 4, 0    |
| 38 | AGACUCACAUCCUAUACUCCU  | 107, 111      | 111 | 477  | 4, 0    |
| 39 | CGCAGCGAAGUAGAUAGACCG  | 64, 225       | 225 | 32   | 4, 0    |
| 40 | GCCUGUACUCUGGCAACAGUC  | 42, 154       | 154 | 505  | 4, 0    |
| 41 | CGUAGGUGACGAUUAGCAUAG  | 106, 51       | 51  | 981  | 4, 0    |
| 42 | CGGCUUGAUACACAGCGUUCG  | 132, 212      | 212 | 117  | 4, 0    |
| 43 | GUAAUAACUUUCUGCUAUAUA  | 229, 188      | 188 | 626  | 4, 0    |
| 44 | AUGUAUUGAUGGAGGCUUUCU  | 71, 83        | 83  | 731  | 4, 0    |
| 45 | AUGAGCCUGCUGUCCAUAUAC  | 15, 180       | 180 | 97   | 4, 0    |
| 46 | CAAAUGCGGCAUUCUACCAUC  | 9, 162        | 162 | 202  | 4, 0    |
| 47 | AGGGCCAUGGACUAUGGAAG   | 70, 222       | 222 | 376  | 0, 0    |
| 48 | GAACUACUGCUAACUCGAUUC  | 174, 38       | 38  | 96   | 4, 0    |
| 49 | ACCUCUAGUUGCUCGUGUAGC  | 105, 224      | 224 | 720  | 4, 0    |
| 50 | CCACAAACAUUUGCAUGCGUU  | 11, 78        | 78  | 1050 | 4, 0    |
| 51 | GGUGUCAUAAUUUCAGUGGUA  | 77, 57        | 57  | 618  | 1, 0    |
| 52 | UCCGCCUAAUGUACCACUUUC  | 144, 34       | 34  | 635  | 4, 0    |
| 53 | AAUGCCAGAUACCUGCUGGUA  | 203, 208, 209 | 209 | 418  | 4, 3, 0 |
| 54 | ACUAGGUGGAGAGGACUGUCA  | 114, 227      | 227 | 3457 | 4, 0    |
| 55 | GAUCGU AUGAGGUCCA UUC  | 182, 29       | 29  | 70   | 4, 0    |
| 56 | GUAUUUCU AACAGUUGCCUU  | 223, 56       | 56  | 927  | 3, 0    |
| 57 | GUUCCAUGGGCCGCAUUGA    | 87, 122       | 122 | 101  | 4, 0    |
| 58 | UGUCUACAUGGAUAACACUGC  | 145, 3        | 3   | 572  | 1, 0    |
| 59 | AUGGAAGGCU GCAUUGAGCU  | 73, 95        | 95  | 551  | 4, 0    |
| 60 | CCAUCUUGGGCCGGCGUGCC   | 76, 227       | 227 | 69   | 4, 0    |
| 61 | GUACUACUUACAGAUUAUAU   | 97, 209       | 209 | 882  | 4, 0    |
| 62 | CACAGCUUGGUGUGCAUCAU   | 142, 227      | 227 | 2428 | 4, 0    |
| 63 | CCGCGUACUUUGCGUUGUAC   | 213, 220      | 220 | 16   | 1, 0    |
| 64 | UUUUACUGAAGUCCGAACCUG  | 218, 48       | 48  | 842  | 4, 0    |
| 65 | AGACCGUGGAGCGAGUGCCA   | 113, 225      | 225 | 3    | 4, 0    |
| 66 | UAUUGCGGUA AAGAGCGUCCA | 86, 189       | 189 | 330  | 4, 0    |
| 67 | UGAGCCGCAUACUCGCAUCU   | 201, 211      | 211 | 649  | 4, 0    |
| 68 | UCAGACUGGGAUCCUGGAUA   | 71, 110       | 110 | 126  | 4, 0    |
| 69 | UCCGGUACCGGUGGUCUCCG   | 13, 21        | 21  | 410  | 3, 0    |
| 70 | GGUCAAUAUUGGUCACACUG   | 174, 103      | 103 | 552  | 4, 0    |
| 71 | CUAAGGUCGAAUCCACCCAC   | 217, 215      | 215 | 1127 | 4, 0    |
| 72 | CUCUAAAUAAGCACUGGAUA   | 96, 151       | 151 | 164  | 4, 0    |

|     |                        |          |     |      |      |
|-----|------------------------|----------|-----|------|------|
| 73  | ACCCCGAUAGCUGAAGGGAUG  | 175, 192 | 192 | 512  | 4, 0 |
| 74  | AGAAACGGACGGAGUGGGCCG  | 24, 202  | 202 | 314  | 4, 0 |
| 75  | CAUUGGAUAAAACACAGGUGC  | 197, 200 | 200 | 380  | 4, 0 |
| 76  | UAUCCGGGUUGGACAAAAGU   | 88       | 88  | 278  | 0    |
| 77  | CCGCCUCGGGGGAUGUAGGAA  | 181      | 181 | 328  | 0    |
| 78  | ACAGUCAAGCCAUUAGGGUUG  | 16       | 16  | 304  | 0    |
| 79  | GGAGUCAUGCAGCUGACCGGU  | 82       | 82  | 662  | 0    |
| 80  | UAUUCCAUGCUAUGUCCACGG  | 186      | 186 | 354  | 0    |
| 81  | CCUAACUCAGUCUCCCAUCGC  | 171      | 171 | 59   | 0    |
| 82  | AUAGUGUUUGUUACUGUAUCC  | 46       | 46  | 657  | 0    |
| 83  | AAUGCACGGGUUGUUUCGUAU  | 8        | 8   | 364  | 0    |
| 84  | CCAUACCCGCCAGUGUGUAUU  | 20       | 20  | 164  | 0    |
| 85  | GCUAAUACUGACUGAGAUCAC  | 136      | 136 | 407  | 0    |
| 86  | CAAUACAUCCUCUAUACUUC   | 66       | 66  | 591  | 0    |
| 87  | GUCCGUCGCCCCUACCAGCAC  | 4        | 4   | 74   | 0    |
| 88  | GAAUUGCAGCUGUGCAGGGCU  | 139      | 139 | 336  | 0    |
| 89  | AACAGUGUUGCAGUAAGCACA  | 52       | 52  | 7    | 0    |
| 90  | ACAGAGUUUGAAUCGAGCCGA  | 176      | 176 | 5    | 0    |
| 91  | GAAAGUUAGCCCACAUUGGCA  | 124      | 124 | 411  | 0    |
| 92  | UAGCGGGAGGAACGCAUCCCC  | 44       | 44  | 20   | 0    |
| 93  | GAUCCAGGUACGGAUGGACAU  | 195      | 195 | 448  | 0    |
| 94  | UCGCGCCAUUGAGGGCCGUAG  | 128      | 128 | 373  | 0    |
| 95  | ACACCGUGUGCGUACUCACAG  | 164      | 164 | 407  | 0    |
| 96  | AAUACAUCUAUGGAUUGGGCA  | 147      | 147 | 271  | 0    |
| 97  | GUGCUCGCCUCGAUGUUAACC  | 191      | 191 | 558  | 0    |
| 98  | UGGGACCAUGACCAAUCAGAG  | 193      | 193 | 181  | 0    |
| 99  | AUUGUUUAGGCCACAAGCUA   | 129      | 129 | 700  | 0    |
| 100 | UGUCUAGCAGAGUUCUCUCC   | 137      | 137 | 507  | 0    |
| 101 | UCACCAUAGUGCAAAACGGCU  | 26       | 26  | 127  | 0    |
| 102 | UUUGAGCGUCUCUACAGUCGA  | 205      | 205 | 559  | 0    |
| 103 | GUGAGCUUUUUUUGCAGCUCAG | 59       | 59  | 291  | 0    |
| 104 | UUUAAUGGGUAUACUUUACAC  | 40       | 40  | 444  | 0    |
| 105 | UGUCCCACCUACUGUAACUCC  | 89       | 89  | 151  | 0    |
| 106 | UUCACGUUUUAUGUUUGGGC   | 69       | 69  | 241  | 0    |
| 107 | ACUCUUGGUACAAAGAAGGAA  | 115      | 115 | 82   | 0    |
| 108 | UUGGCUUGUCCUGGUAUAGC   | 65       | 65  | 1053 | 0    |
| 109 | GCUUCGGGAUAACGAUGAGUG  | 183      | 183 | 621  | 0    |
| 110 | CCGAGCCCGCCUCCUCCGUA   | 199      | 199 | 362  | 0    |
| 111 | CAUACGUGGCAACUAACACAG  | 157      | 157 | 628  | 0    |
| 112 | UAAGCAUGGUUCUAGUCAUAA  | 126      | 126 | 70   | 0    |
| 113 | AUUAGCAAACUCUUCUGAUGC  | 130      | 130 | 658  | 0    |

|     |                        |     |     |      |   |
|-----|------------------------|-----|-----|------|---|
| 114 | GCGUCCGCUCGACACGAGCUG  | 101 | 101 | 219  | 0 |
| 115 | ACUCAUUAAAAGAGUGUUCUC  | 31  | 31  | 1001 | 0 |
| 116 | AGAACUAUUCUCCUGUUC AAC | 190 | 190 | 198  | 0 |
| 117 | UCACUCUUAUGUUGCAACCUG  | 159 | 159 | 700  | 0 |
| 118 | AAGAACUGGUGACCCUUUC    | 50  | 50  | 585  | 0 |
| 119 | ACUUAGCAGUCAACUGAACGA  | 39  | 39  | 207  | 0 |
| 120 | UAUAGUAAGCUCGUGGAUAUC  | 187 | 187 | 713  | 0 |
| 121 | AUAGUUUUUAUACCGCCGUCG  | 118 | 118 | 419  | 0 |
| 122 | UCUACCUCUGAUCAGGGUAU   | 194 | 194 | 538  | 0 |
| 123 | UUCGGUUCUGAUUCCUAUAC   | 2   | 2   | 153  | 0 |
| 124 | UCUCGCUCGAAGCUGAGAACU  | 54  | 54  | 301  | 0 |
| 125 | AUUUCUUAGCAAUCGGUACCG  | 53  | 53  | 210  | 0 |
| 126 | GAGGCAUUUAAAAGGCACCC   | 177 | 177 | 715  | 0 |
| 127 | UCACGAGAUUGGUUUAAGUA   | 99  | 99  | 934  | 0 |
| 128 | GAACUUACAGUGCGUCGUCGG  | 23  | 23  | 454  | 0 |
| 129 | UAUACGACAGCUAAAUGACC   | 104 | 104 | 260  | 0 |
| 130 | UCUGUGGUACCCUCCAGACCG  | 156 | 156 | 383  | 0 |
| 131 | CUAUUGUAUGGUUUCUGCACC  | 172 | 172 | 274  | 0 |
| 132 | UGUAAUUCGUGCAUUAUGUU   | 196 | 196 | 565  | 0 |
| 133 | UAGCCCGCUUGGAACUUCUGA  | 131 | 131 | 86   | 0 |
| 134 | CGAACCGAUUAUUCGAGUGUG  | 117 | 117 | 366  | 0 |
| 135 | CAA AUGACUGGAACCAUACUC | 19  | 19  | 247  | 0 |
| 136 | AUUAGAGAACAGUCCCCAUUA  | 109 | 109 | 261  | 0 |
| 137 | UAAUUUUCUCGAAAUAGGGCG  | 116 | 116 | 690  | 0 |
| 138 | CGUUAACGAUCGGGUAGGAC   | 149 | 149 | 207  | 0 |
| 139 | ACAUGCUGCUCUGGUUCGCGU  | 163 | 163 | 61   | 0 |
| 140 | UAUGCUC CAGUCAUGCAGGAC | 150 | 150 | 311  | 0 |
| 141 | ACAUUCAGUUUGUUGAGUCGU  | 185 | 185 | 159  | 0 |
| 142 | GAUUGCUUUUGCGCAUUCUCG  | 198 | 198 | 145  | 0 |
| 143 | AGUGCAUCAUGGAGACUGCGC  | 93  | 93  | 405  | 0 |
| 144 | AAACACGCCACGUGGCAAGGA  | 161 | 161 | 211  | 0 |
| 145 | CUUGUGCAACCUCCGUUAGA   | 141 | 141 | 281  | 0 |
| 146 | UAUUCGGGCGCUCUCAGAGAA  | 108 | 108 | 206  | 0 |
| 147 | CAUUUAGGAUAGUAAUUAACC  | 214 | 214 | 658  | 0 |
| 148 | UUAAAUGAGUCAUCUUGUAAC  | 41  | 41  | 1000 | 0 |
| 149 | ACGAUCAACUUGACACCGGU   | 140 | 140 | 516  | 0 |
| 150 | CGUGGGCCUGGUGCAUUA AAC | 47  | 47  | 469  | 0 |
| 151 | CCUCACCGAGCAUCCUUAAGG  | 98  | 98  | 867  | 0 |
| 152 | CUGAACGCGAGACCGCUCGUC  | 135 | 135 | 28   | 0 |
| 153 | ACAUGCCCUAAUUUCCUACGA  | 1   | 1   | 799  | 0 |
| 154 | UAUCUGGGUAUUAGAACCCCU  | 228 | 228 | 555  | 0 |

|            |                       |     |     |     |   |
|------------|-----------------------|-----|-----|-----|---|
| <b>155</b> | UACGAUCACACAGCGUAAAGA | 169 | 169 | 263 | 0 |
| <b>156</b> | AGAGCCCUAGGGUGCUUAUCA | 100 | 100 | 99  | 0 |
| <b>157</b> | UCUCUUUUUAGAGAGACCACG | 17  | 17  | 286 | 0 |
| <b>158</b> | UUUAUCCUUAACUAAGCGGCC | 72  | 72  | 790 | 0 |
| <b>159</b> | AAAGCAAUUCUGCUUGGACUG | 138 | 138 | 443 | 0 |
| <b>160</b> | CCUGGCAUUUUGUGAAAGGAU | 152 | 152 | 608 | 0 |
| <b>161</b> | AAUAUUUGACUUCGAACUAAC | 18  | 18  | 263 | 0 |
| <b>162</b> | CGAGACUGAAGGCCGUGGCAA | 22  | 22  | 125 | 0 |

\* The Transcription factor numbers and positions of the qualified sequences which the selected qualified siRNAs are derived from.

\*\* The mismatch numbers between qualified siRNA and its target genes.



**Table S3**

**Parameters:  $d_T=3, d_N=5, L=21$**

Number of non-redundant qualified siRNAs: **487**

Number of qualified siRNAs selected in the first round of RNAi analysis: **142**

Number of candidate-genes examined in the first round of RNAi analysis: **229**

Average examination frequency of each gene: **1.15283842795**

| No. | Selected qualified siRNA | Target genes of qualified siRNA (TF number) | *Qualified sequence |          | **Mismatch numbers  |
|-----|--------------------------|---------------------------------------------|---------------------|----------|---------------------|
|     |                          |                                             | TF number           | Position |                     |
| 1   | UGAUCUCUAUCUCCCCUCC      | 211, 210, 207, 209, 208, 75, 206            | 206                 | 149      | 3, 2, 1, 1, 2, 3, 0 |
| 2   | UAUCGUAAGCUCGGCCCGG      | 167, 112, 74, 175                           | 175                 | 167      | 2, 3, 3, 0          |
| 3   | CAUAAGCCUUCUUCAGGAGGC    | 68, 58, 104, 206                            | 206                 | 224      | 3, 3, 2, 0          |
| 4   | ACGUUUAGAAGCUUCUCCGC     | 103, 77, 57                                 | 57                  | 114      | 3, 2, 0             |
| 5   | AGAAACUCAACUUGCCGUGC     | 159, 67, 146                                | 146                 | 188      | 2, 3, 0             |
| 6   | CUGGCGACUUGAGUUGGUGUC    | 120, 49, 5                                  | 5                   | 117      | 1, 3, 0             |
| 7   | UUUAGAACAUGCGUGGAAUG     | 144, 3, 145                                 | 145                 | 310      | 3, 1, 0             |
| 8   | UUCUGCCCAUUAUCCUCCAC     | 187, 106, 157                               | 157                 | 503      | 2, 3, 0             |
| 9   | UAUUGUUCUUUAUAAAGACCU    | 46, 70, 222                                 | 222                 | 576      | 3, 0, 0             |
| 10  | UCUUUCUUGAUGACCUUGAUA    | 122, 6, 158                                 | 158                 | 871      | 3, 0, 0             |
| 11  | CUUCCUGCAUGCUUAACUAUC    | 86, 45, 191                                 | 191                 | 62       | 3, 3, 0             |
| 12  | UUCAGCCACCGAAGCCGGCAG    | 220, 69, 221                                | 221                 | 267      | 3, 3, 0             |
| 13  | UAUGAACAGUUAGAGACCUG     | 204, 143, 32                                | 32                  | 197      | 2, 3, 0             |
| 14  | GGUAUCGAAGGUGCCAAGCCA    | 149, 102, 112                               | 112                 | 588      | 3, 3, 0             |
| 15  | UAUUUGAGCCUUUAAAAUUUA    | 116, 36, 220                                | 220                 | 983      | 3, 3, 0             |
| 16  | UGUUUCCGGCAAGUUUGUUG     | 133, 168                                    | 168                 | 218      | 1, 0                |
| 17  | UCUCACUCUUCACUUCCUUC     | 65, 73                                      | 73                  | 582      | 2, 0                |
| 18  | ACAAUAAUGAAAUGCAAUGGG    | 127, 170                                    | 170                 | 496      | 0, 0                |
| 19  | GAUCUCGUGCCACCUCGGAG     | 94, 151                                     | 151                 | 685      | 2, 0                |
| 20  | CAUAGCAUUAUGUUUUCUAAA    | 12, 223                                     | 223                 | 914      | 3, 0                |
| 21  | CCAAUCAAUCAACCAAUACG     | 166, 139                                    | 139                 | 677      | 3, 0                |
| 22  | CGCGGCAGCGGGUGCCUCCGU    | 78, 30                                      | 30                  | 409      | 3, 0                |
| 23  | UCAUCGAGUAUGAAAAGAACG    | 34, 212                                     | 212                 | 1216     | 3, 0                |
| 24  | AGUCAAUACCCGAACCAACAC    | 163, 161                                    | 161                 | 282      | 1, 0                |
| 25  | CCUCUCGGCUUCACAUUGGUU    | 205, 190                                    | 190                 | 2        | 2, 0                |
| 26  | CCAUUAGAUGGAGACGACUGU    | 227, 114                                    | 114                 | 170      | 3, 0                |
| 27  | GCUCCGCAAAGAACGGCCAAG    | 215, 216                                    | 216                 | 1294     | 3, 0                |
| 28  | CCUAGACAACCAAGUGAAACUC   | 177, 178                                    | 178                 | 131      | 3, 0                |
| 29  | ACUUACAAGUCCAGUCUUCA     | 179, 200                                    | 200                 | 162      | 4, 0                |
| 30  | CUUCUUAGAGCGAGAGAGAGG    | 110, 213                                    | 213                 | 80       | 3, 0                |

|    |                        |             |     |      |         |
|----|------------------------|-------------|-----|------|---------|
| 31 | CAAAGUUCUACUAAAUUAAGU  | 71, 131     | 131 | 242  | 3, 0    |
| 32 | CAAAUCAACAUUCAAGGUAUU  | 183, 154    | 154 | 690  | 3, 0    |
| 33 | CGUGAUGCUCGCGGUACCGGU  | 15          | 15  | 228  | 0       |
| 34 | GAAGUAUAGAUUUAAGAGAA   | 134, 61     | 61  | 618  | 3, 0    |
| 35 | UCGUAGCGGGAGAGAGAAGAG  | 193, 54     | 54  | 136  | 3, 0    |
| 36 | CUCGCAUCUCCUCCUUUCCGC  | 124, 1      | 1   | 552  | 3, 0    |
| 37 | AGUUCGGUUCUCGCGCCGACGC | 218, 24     | 24  | 502  | 3, 0    |
| 38 | GCAAUCGUUCUGAAGACAGGC  | 150, 229    | 229 | 369  | 3, 0    |
| 39 | GCUUCUAUCUCCUCAUCAUAC  | 66, 56      | 56  | 636  | 3, 0    |
| 40 | AACCACUUAUCGAUGCAAUCU  | 11, 14      | 14  | 68   | 3, 0    |
| 41 | GUAUCUGGUGAUUAUCAAGAGA | 111, 174    | 174 | 13   | 2, 0    |
| 42 | UCCUCCUCCAUACCUUUCUU   | 214, 186    | 186 | 157  | 3, 0    |
| 43 | AAUUGAUGGUGGCAUAAAUCC  | 15, 29      | 29  | 586  | 3, 0    |
| 44 | GAAACAGAGAAGGUGAGCUUU  | 4, 96       | 96  | 691  | 3, 0    |
| 45 | UGAGGCCUUUGCCGCUUGGUU  | 22, 197     | 197 | 258  | 3, 0    |
| 46 | CCUCCAGACCGGCAUUUUUGA  | 109, 156    | 156 | 373  | 3, 0    |
| 47 | CUUGGAGUAUCAGCAUGUUGC  | 135, 201    | 201 | 524  | 2, 0    |
| 48 | CUUCAGCUGCGCCAUGGCUG   | 152, 162    | 162 | 750  | 3, 0    |
| 49 | GAACCCAAAUGACAUAUGA    | 10, 172     | 172 | 463  | 3, 0    |
| 50 | UCGUUCACAAACAUUGCAGCU  | 43, 63      | 63  | 175  | 3, 0    |
| 51 | CCCAGCACACUCCUCCUCCC   | 9, 164      | 164 | 830  | 4, 0    |
| 52 | CAACAUCAGCUCUCACCGAA   | 98, 95      | 95  | 791  | 3, 0    |
| 53 | GCUUCAGCUUCGUUCUCGCUC  | 125, 37     | 37  | 618  | 3, 0    |
| 54 | CAUUUAUCCUUCAGGUCAACA  | 19, 184     | 184 | 305  | 3, 0    |
| 55 | UUUGAAAAGGUCUCCAACGU   | 39, 28      | 28  | 576  | 3, 0    |
| 56 | CGCAAUAACCAACAAUAAUA   | 23, 85      | 85  | 937  | 3, 0    |
| 57 | CCUUAAAUCUUCUUCAGAAG   | 129, 64     | 64  | 355  | 3, 0    |
| 58 | AAGAUGAUUAAAAGAAGCUAGG | 130, 89     | 89  | 604  | 3, 0    |
| 59 | UCUGUCCUCGAGCCAUCGAG   | 142, 7      | 7   | 22   | 2, 0    |
| 60 | GUUGAAAUAAGCGAGGAACUU  | 79, 83      | 83  | 1289 | 3, 0    |
| 61 | GAGUACUGCUUCUUCGUCAAC  | 87, 91      | 91  | 874  | 3, 0    |
| 62 | AGAACAACGUAAGGAUCGCUG  | 48, 188     | 188 | 122  | 3, 0    |
| 63 | AAGAAAAGAAGCAUCCAUAA   | 138, 97     | 97  | 441  | 3, 0    |
| 64 | AGAGCUCGAUGAGCUCGAGCU  | 50, 20      | 20  | 306  | 3, 0    |
| 65 | AAAGCCUUGUCUUUUUUCUGC  | 76, 196     | 196 | 255  | 3, 0    |
| 66 | UCUCAGUGAUCCAGCCAUCAA  | 224, 100    | 100 | 445  | 3, 0    |
| 67 | UCUGUGGUUACAGAAGAAUGC  | 107, 123    | 123 | 917  | 3, 0    |
| 68 | CAGUAGGAUGGAAUCUGAAAC  | 155, 33     | 33  | 195  | 3, 0    |
| 69 | GAUUUCCUGCUUCUAGACAUC  | 26, 141     | 141 | 310  | 3, 0    |
| 70 | AGCUCCUUGGCCUUCUUAAGA  | 207, 68, 60 | 60  | 170  | 2, 3, 0 |
| 71 | UCACAAUGUCUUCUGGUUUUU  | 86, 45, 189 | 189 | 507  | 3, 3, 0 |

|     |                        |          |     |      |      |
|-----|------------------------|----------|-----|------|------|
| 72  | AGGUGCCAAGCCAAGCCCGGU  | 112, 90  | 90  | 239  | 3, 0 |
| 73  | AUUUUUGGACCAUGUCAUCAA  | 103, 93  | 93  | 63   | 0, 0 |
| 74  | CAUCGUCAUGAUGGGCUUUUC  | 53, 73   | 73  | 431  | 3, 0 |
| 75  | UUACGCCAGUGGCGCUACCGC  | 102, 160 | 160 | 59   | 3, 0 |
| 76  | GGUUCAUGGACAAAAAGCUCC  | 116, 165 | 165 | 904  | 2, 0 |
| 77  | AGCUGGGAGGGGUAGGAGGGG  | 99, 227  | 227 | 3437 | 3, 0 |
| 78  | CCGGCUUUUCUUGGGAGAAGG  | 219, 106 | 106 | 95   | 3, 0 |
| 79  | AAAAUUCAUACAUUUAGAU    | 136, 212 | 212 | 1689 | 3, 0 |
| 80  | UAGCUUUUUCGGGGCCUCCGA  | 68, 105  | 105 | 31   | 3, 0 |
| 81  | UGGGCUUUCUGUGCUGGGGGG  | 228, 204 | 204 | 727  | 3, 0 |
| 82  | GCAAUGUACAUAUUUAUGAGA  | 47, 71   | 71  | 1796 | 3, 0 |
| 83  | GUGUGAGCGAAGAAGCACACA  | 55, 164  | 164 | 500  | 3, 0 |
| 84  | UCACGAAGGCCCGCCGUCGAUG | 212, 217 | 217 | 1055 | 3, 0 |
| 85  | UGAUGAAAAGUUCGGUUCUCC  | 31, 24   | 24  | 510  | 3, 0 |
| 86  | GCAAGCAAAGCAAAAUUAUUC  | 177, 81  | 81  | 829  | 3, 0 |
| 87  | CCAUCUCAACUAGUAUGAAAA  | 212, 171 | 171 | 34   | 3, 0 |
| 88  | AAUGCGAGCACUUCUCGUCA   | 62, 120  | 120 | 166  | 3, 0 |
| 89  | GGUCAGCUGGAUUUGAAGGAA  | 192, 150 | 150 | 657  | 3, 0 |
| 90  | UCUCUGAAUUC AACUUGAUCU | 72, 98   | 98  | 258  | 3, 0 |
| 91  | CAUCAGCAGAAGUGGUGAUAA  | 98, 41   | 41  | 446  | 3, 0 |
| 92  | CCUUGAUCGGCUUCUGACCAU  | 106, 51  | 51  | 870  | 1, 0 |
| 93  | CGGCAAAAACUGAAAUCUUUU  | 132, 95  | 95  | 824  | 3, 0 |
| 94  | UUAUAACGAUAAUACAGACGC  | 40, 20   | 20  | 738  | 3, 0 |
| 95  | CUUGAACUCUGAAUAACUUCG  | 92, 223  | 223 | 1118 | 3, 0 |
| 96  | AUUAAGAAACCUAUCCUCUAU  | 121, 130 | 130 | 1181 | 3, 0 |
| 97  | UAACACUUUAUAGCAUUACAU  | 118, 89  | 89  | 924  | 3, 0 |
| 98  | GUGUAAUCCCCCGUCACUCC   | 173, 20  | 20  | 207  | 3, 0 |
| 99  | GGGGGAAGUUGCGGUAGAGCU  | 199, 227 | 227 | 1596 | 3, 0 |
| 100 | UGUGACCUCACAGGGGGCA    | 44       | 44  | 329  | 0    |
| 101 | AAUAAAUGGCUCAUUCUCAA   | 203      | 203 | 721  | 0    |
| 102 | CUUAAAAUUGAUCAUUUCAU   | 108      | 108 | 661  | 0    |
| 103 | AGAGUCUUAACAAGAUUUGC   | 226      | 226 | 280  | 0    |
| 104 | AUAAACACUCUCUACCUCUGA  | 194      | 194 | 548  | 0    |
| 105 | AGACGAGGUAGAAUUUUUGA   | 80       | 80  | 299  | 0    |
| 106 | UCAUAAAAACCAACUCUCUCA  | 82       | 82  | 614  | 0    |
| 107 | GAUUUGUCUAUGCUAUAACA   | 119      | 119 | 295  | 0    |
| 108 | GAUCCGAUCUGAAUCCCAAGA  | 148      | 148 | 455  | 0    |
| 109 | UGUGCAGAAAACUGGUCCA AU | 42       | 42  | 359  | 0    |
| 110 | GUUGAUCCUGGAAGGCACAUU  | 16       | 16  | 83   | 0    |
| 111 | GAAACUUGAGAAUCACCUUCC  | 198      | 198 | 362  | 0    |
| 112 | GAAUAUGAGUGAUUCUACUCC  | 128      | 128 | 734  | 0    |

|     |                        |     |     |      |   |
|-----|------------------------|-----|-----|------|---|
| 113 | CCUAAUAGGAAUGGGGAAAAC  | 182 | 182 | 74   | 0 |
| 114 | AGAUUCGUGCCUUUGCAAAA   | 137 | 137 | 793  | 0 |
| 115 | AUAAAACUGACAGCAGCUGA   | 84  | 84  | 123  | 0 |
| 116 | AAAUCUUUAAAAUAGCAGAAC  | 8   | 8   | 601  | 0 |
| 117 | CUAGUUGUACACAUAUAUAC   | 35  | 35  | 575  | 0 |
| 118 | GAACUUCUCCUUAAUGCCU    | 180 | 180 | 137  | 0 |
| 119 | CCUGCUGCGCCUGGAUACUGC  | 2   | 2   | 237  | 0 |
| 120 | CGAGAGGCUUACUCGUUGGUA  | 169 | 169 | 420  | 0 |
| 121 | CAUUAAUAAAAGAAAGUCCAC  | 59  | 59  | 462  | 0 |
| 122 | GUAACAUCUAAAAUCACAUAC  | 17  | 17  | 369  | 0 |
| 123 | UCACGGCUGGCGAUUGCAGAA  | 202 | 202 | 369  | 0 |
| 124 | AAAAAACUAAAUGUAACUGC   | 147 | 147 | 667  | 0 |
| 125 | CCAAUUAUUUGACUUCGAACUA | 18  | 18  | 265  | 0 |
| 126 | UAUUGAAGAAUCAUAUUCAGC  | 101 | 101 | 721  | 0 |
| 127 | ACUUCUCGUAACAUAUGUUGG  | 38  | 38  | 7    | 0 |
| 128 | UAGUCCCUCAUGGAUCAUCC   | 126 | 126 | 35   | 0 |
| 129 | AGAGUAAUGAGCUUGAAGCAA  | 52  | 52  | 127  | 0 |
| 130 | GCUGGGAUUCACAAGGCUUUC  | 181 | 181 | 638  | 0 |
| 131 | UGAGGUUUUUCAGUCAUACU   | 115 | 115 | 58   | 0 |
| 132 | UGAUUCGGGUUGGAACUUCAU  | 88  | 88  | 298  | 0 |
| 133 | ACGGCAGAGAGGACAAGUGUC  | 176 | 176 | 96   | 0 |
| 134 | GAUGAAAGAAGAUCCUCAAU   | 117 | 117 | 8    | 0 |
| 135 | CCAAGCUAAAUAACAAGAA    | 225 | 225 | 1307 | 0 |
| 136 | CUAACCCUUAACAUCAUACGA  | 153 | 153 | 724  | 0 |
| 137 | CGACGAACCGUACUCCAGAUC  | 195 | 195 | 465  | 0 |
| 138 | GUAAAUGUUGAGCACACUGGU  | 25  | 25  | 833  | 0 |
| 139 | AAAUAUAUGAAAGAAUCACUA  | 27  | 27  | 617  | 0 |
| 140 | CCAGUCGAGGCGAGAUGCAGG  | 185 | 185 | 40   | 0 |
| 141 | AUUUAGGCUUUAAAUCACAA   | 113 | 113 | 272  | 0 |
| 142 | CCGGCGUUUGCCACUUAGGGC  | 140 | 140 | 450  | 0 |

\* The Transcription factor numbers and positions of the qualified sequences which the selected qualified siRNAs are derived from.

\*\* The mismatch numbers between qualified siRNA and its target genes.
